# Supplementary material
Source: Springer Nature journal article supplement (https://www.springermedizin.de/resource/supplementary/13075_2010_3083_MOESM1_ESM.pdf/9693702)

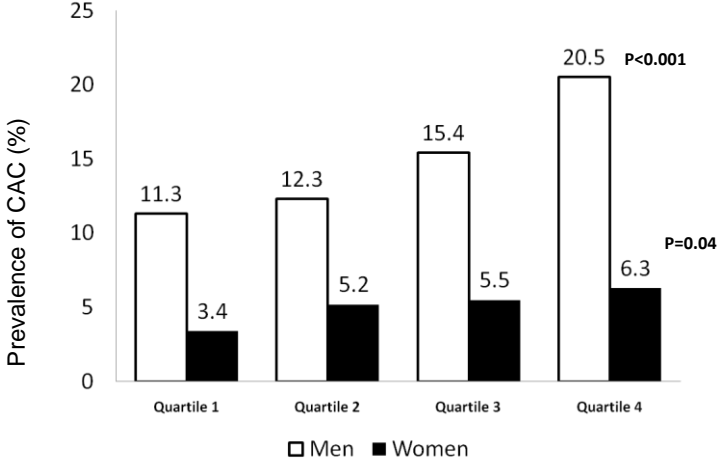

SUA Range for Men: 2.6-4.9  
 SUA Range for Women: 1.3-3.3

5.0-5.6  
 3.3-3.8

5.7-6.6  
 3.9-4.6

6.7-11.6  
 4.7-10.7

Supplement: MOESM1 [file 9693702]
